# Supplementary material
Source: publisher site journal article supplement (https://www.spandidos-publications.com/3071/downloadSupplementary)

Figure S1. RNA knockdown and overexpression experiments were performed in JEG3 and HTR8 cells. (A) JEG3 cells were transfected with siNC, siRNA-001 or siRNA-002, and the expression levels of circ-0004904 were detected by RT-qPCR. (B) HTR8 cells were transfected with OE-NC or OE, and the expression levels of circ-0004904 were detected by RT-qPCR. (C) JEG3 cells were transfected with NC and miR-570 mimics, and the expression levels of miR-570 were detected by RT-qPCR. (D) HTR8 cells were transfected with NC or miR-570 inhibitors, and the expression levels of miR-570 were detected by RT-qPCR. (E) JEG3 cells were transfected with siNC or siATG12, and the mRNA and protein levels of ATG12 were detected by RT-qPCR and western blotting, respectively. (F) HTR8 cells were transfected with OE-NC or pCMV5-ATG12, and the mRNA and protein levels of ATG12 were detected by RT-qPCR and western blotting, respectively. (G) JEG3 cells were transfected with siNC, siFUS-1 or siFUS-2, and the mRNA and protein levels of FUS were detected by RT-qPCR and western blotting, respectively. (H) HTR8 cells were transfected with OE-NC or pCMV5-FUS, and the mRNA and protein levels of FUS were detected by RT-qPCR and western blotting, respectively. Data are presented as the mean  $\pm$  SEM. \* $P$ <0.05. circ, circular RNA; siRNA, small interfering RNA; siNC, negative control siRNA; OE, overexpression vector; NC, negative control; miR, microRNA; RT-qPCR, reverse transcription-quantitative PCR; ATG12, autophagy-related 12; FUS, fused in sarcoma.

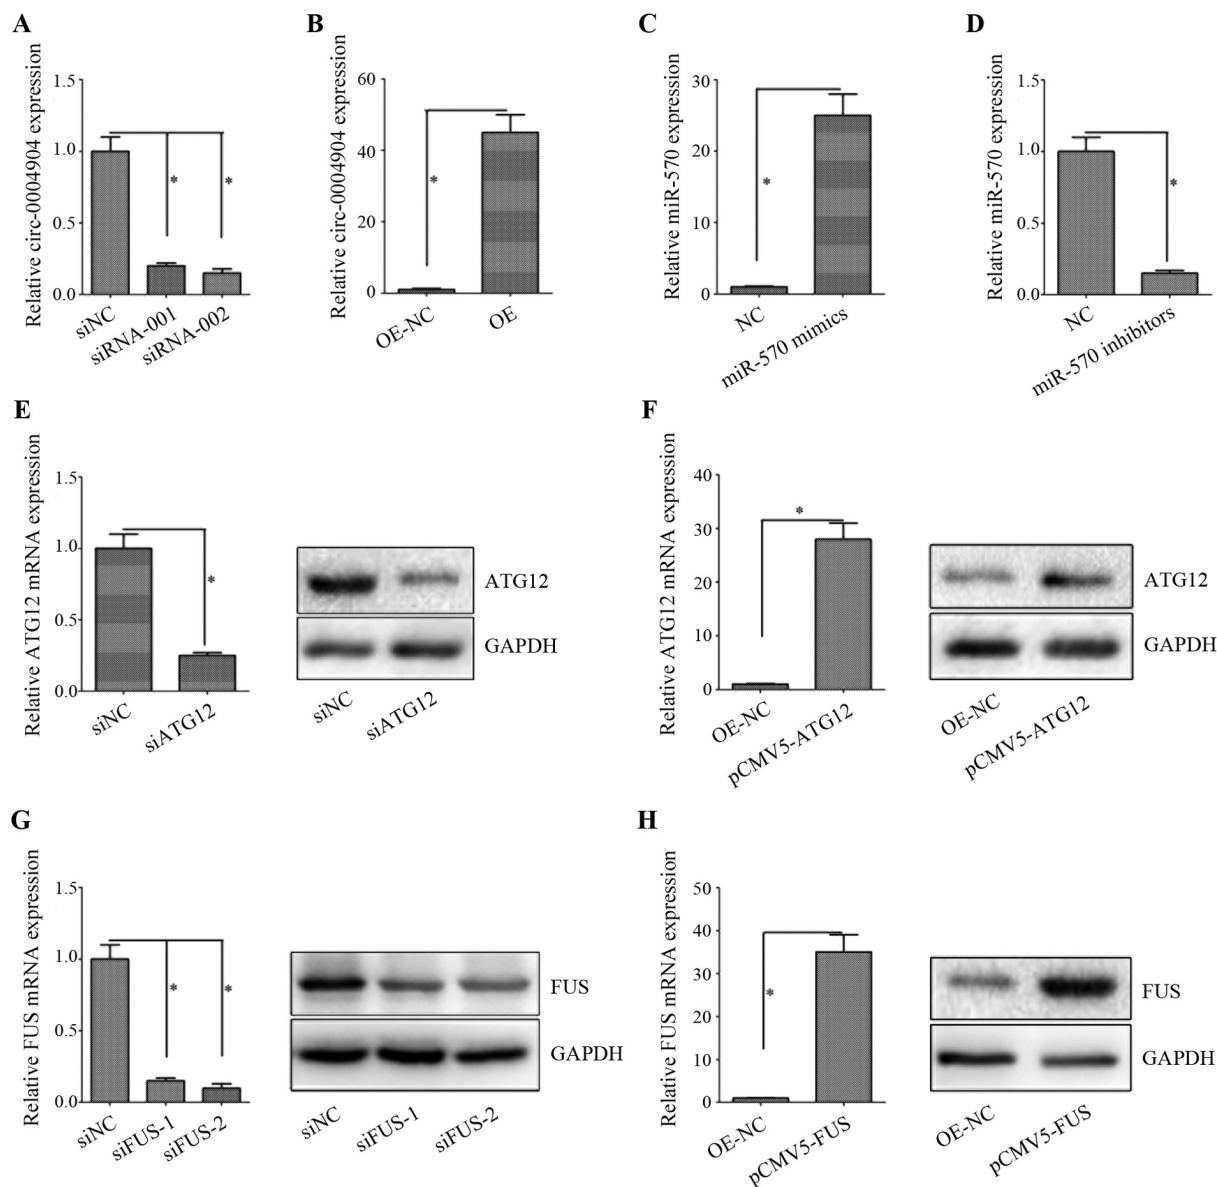

Figure S2. circ-0004904 mediates the proliferation of HTR8 cells. (A and B) The proliferative ability of (A) JEG3 cells transfected with siNC, siRNA-001 or siRNA-002 and (B) HTR8 cells transfected with OE-NC or OE was assessed by EdU assay. circ, circular RNA; siRNA, small interfering RNA; siNC, negative control siRNA; OE, overexpression vector; OE-NC, negative control vector; EdU, 5-ethynyl-2'-deoxyuridine.

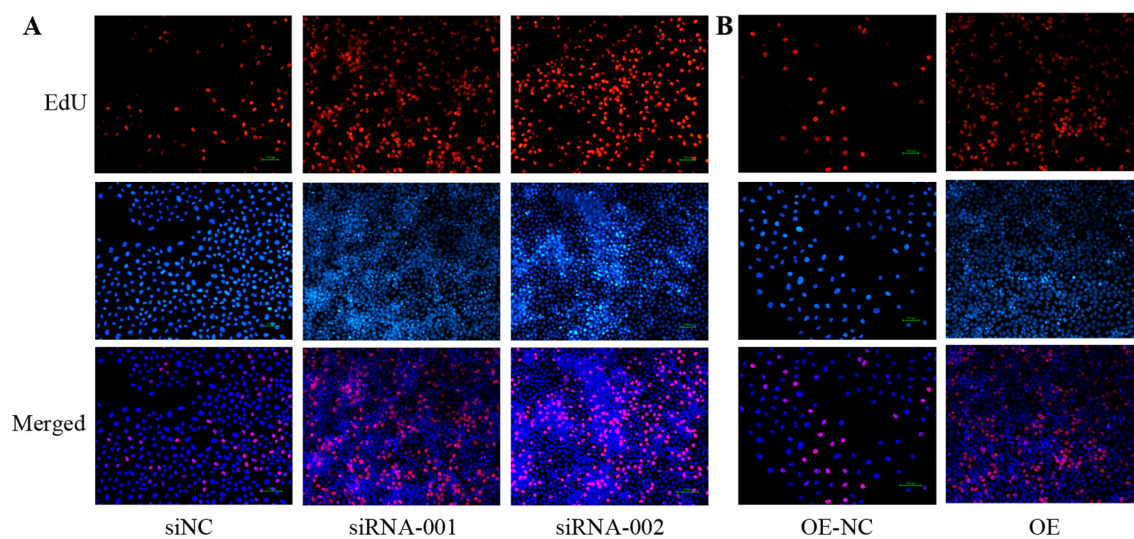

Figure S3. The mechanism of action of circ-0004904.

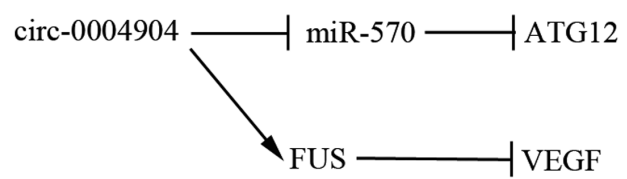

Supplement: Supplementary file 1 [file downloadSupplementary]
